# Supplementary material
Source: MDPI journal article supplement (https://www.mdpi.com/2227-9717/10/2/248)
Supplement: s1 [file s1]

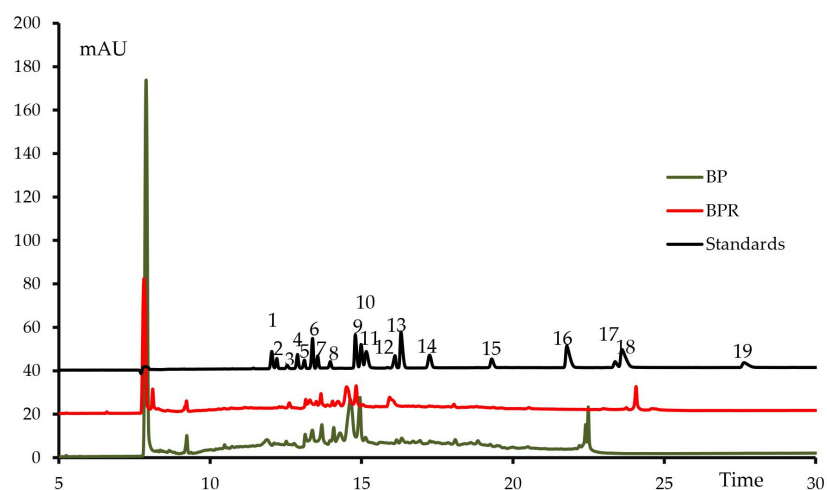

**Figure S1.** Separation of polyphenols by CZE from BP and BPR extracts. The extracts were concentrated 4 times for BP and 2 times for BPR. Standards: 1—rutin; 2—naringenin; 3—rhamnetin; 4—isoquercitrin; 5—umbelliferone; 6—cinnamic acid; 7—sinapic acid; 8—chlorogenic acid; 9—syringic acid; 10—ferulic acid; 11—kaempferol; 12—luteolin; 13—p-coumaric acid; 14—quercetin; 15—rosmarinic acid; 16—caffeic acid; 17—cichoric acid; 18—caftaric acid; 19—gallic acid.
